# Supplementary material for: Assessing Predation Risk to Threatened Fauna from their Prevalence in Predator Scats: Dingoes and Rodents in Arid Australia
Source: PLoS One. 2012 May 1;7(5):e36426. doi: 10.1371/journal.pone.0036426 (PMC3341367; doi:10.1371/journal.pone.0036426)
Supplement: Table S2 — The frequency distribution of reported sample sizes in 47 studies of dingo scats and stomachs from six climate types across Australia. (XLSX) [file pone.0036426.s002.xlsx]

## Sheet: Table S2
N scats	N studies	% of studies
0-100	9	0.19
101-200	12	0.25
201-300	4	0.09
301-400	4	0.09
401-500	4	0.09
501-750	1	0.02
751-1000	3	0.06
1001-1500	5	0.11
1501-2000	2	0.04
>2000	3	0.06
